# Supplementary material for: Neuroprotection and immunomodulation following intraspinal axotomy of motoneurons by treatment with adult mesenchymal stem cells
Source: Springer Nature journal article supplement (doi:10.1186/s12974-018-1268-4), 2018-08-14

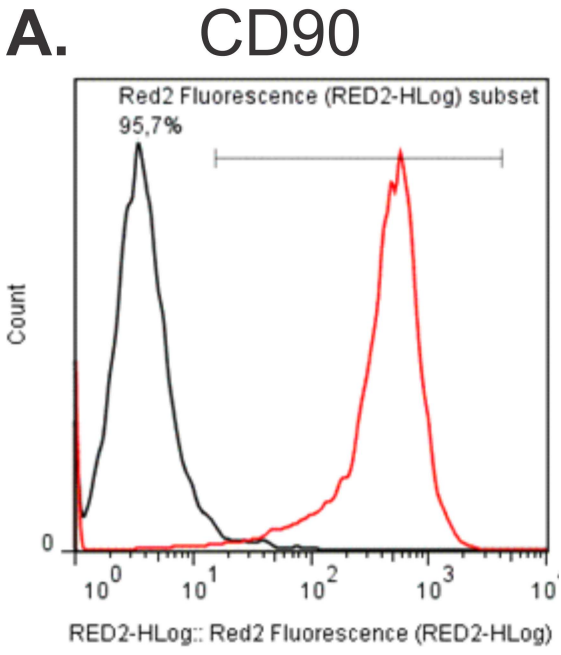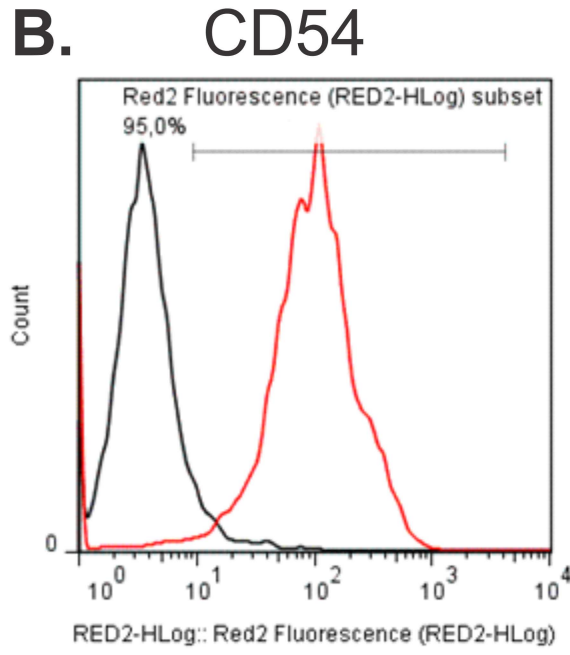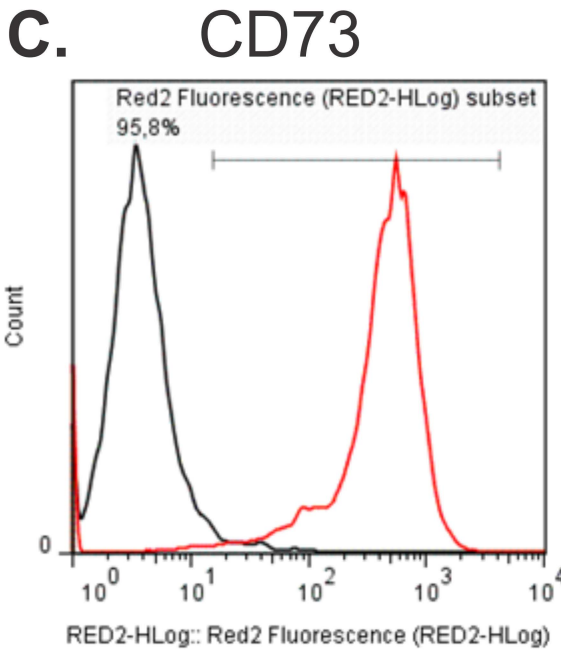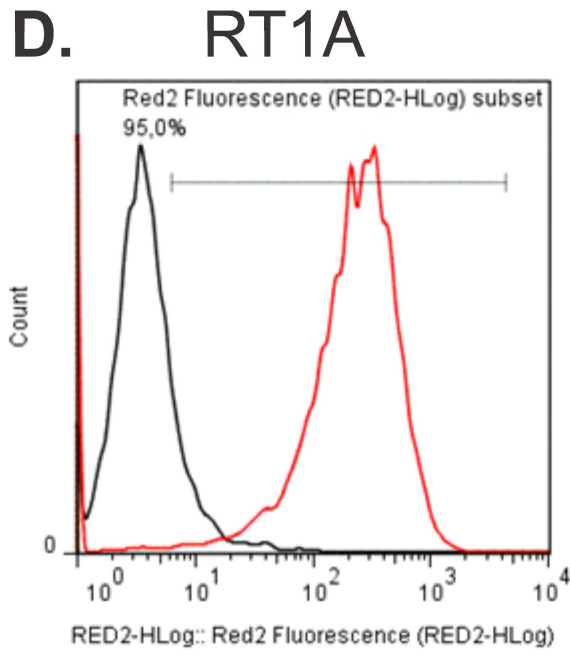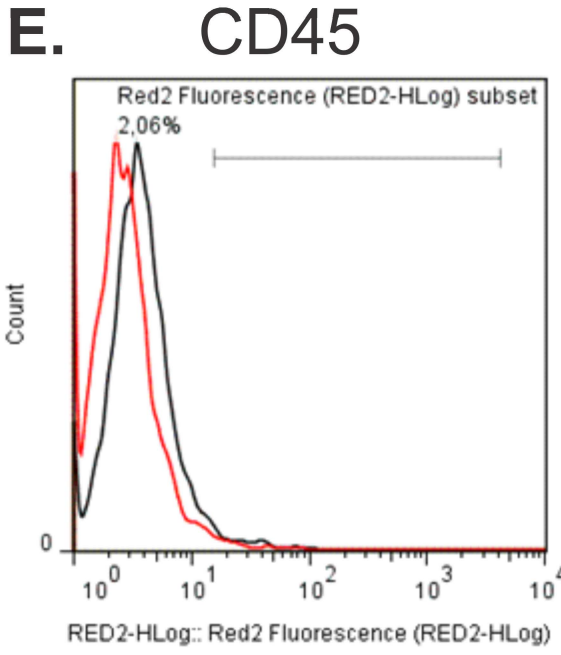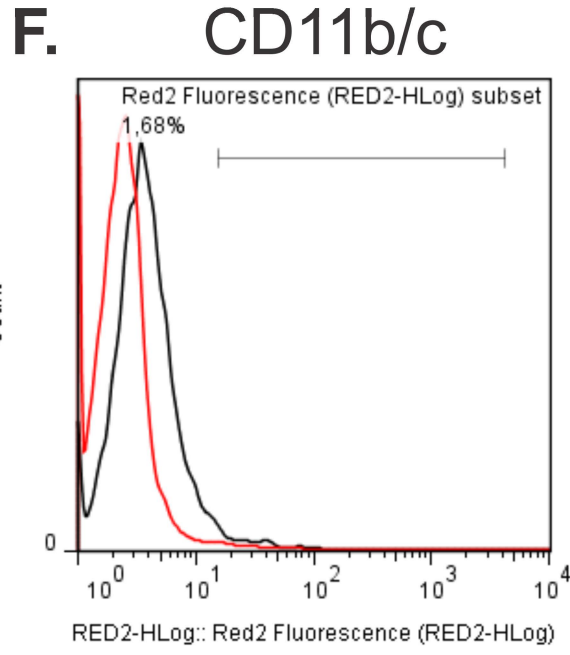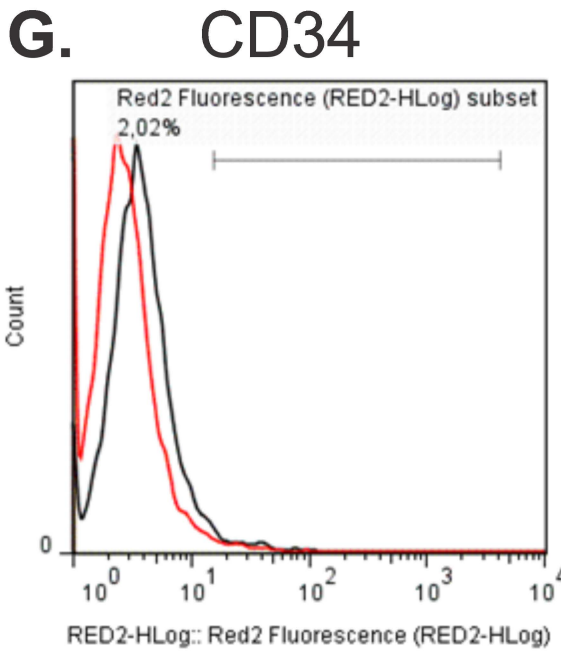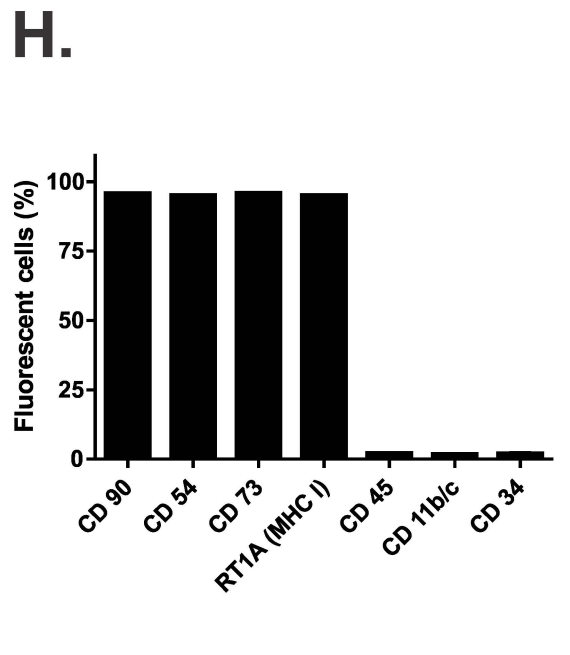

Supplement: MOESM4 [file 16037004]
